# Supplementary material for: Development of functionalized multi-walled carbon-nanotube-based alginate hydrogels for enabling biomimetic technologies
Source: PubMed Central journal article supplement (PMC5006027; doi:10.1038/srep32456), 2016-08-31
Supplement: srep32456-s1.pdf [file srep32456-s1.pdf]

## Development of functionalized multi-walled carbon-nanotube-based alginate hydrogels for enabling biomimetic technologies

Binata Joddar<sup>1,2\*</sup>, Eduardo Garcia<sup>3•</sup>, Atzimba Casas<sup>4•</sup>, Calvin M. Stewart<sup>3</sup>,  
1Department of Metallurgy, Materials Science and Biomedical Engineering, 2Border  
Biomedical Research Center.

3Department of Mechanical Engineering, 4Department of Biological Sciences,  
The University of Texas at El Paso, 500 W University Avenue, El Paso, TX 79968, USA.

\*Corresponding Author: bjoddar@utep.edu; Fax: (915)747-8036, Phone: (915)747-8456.

•Indicates equal contribution.

### Supplementary Figures

#### Schematic for gel formation

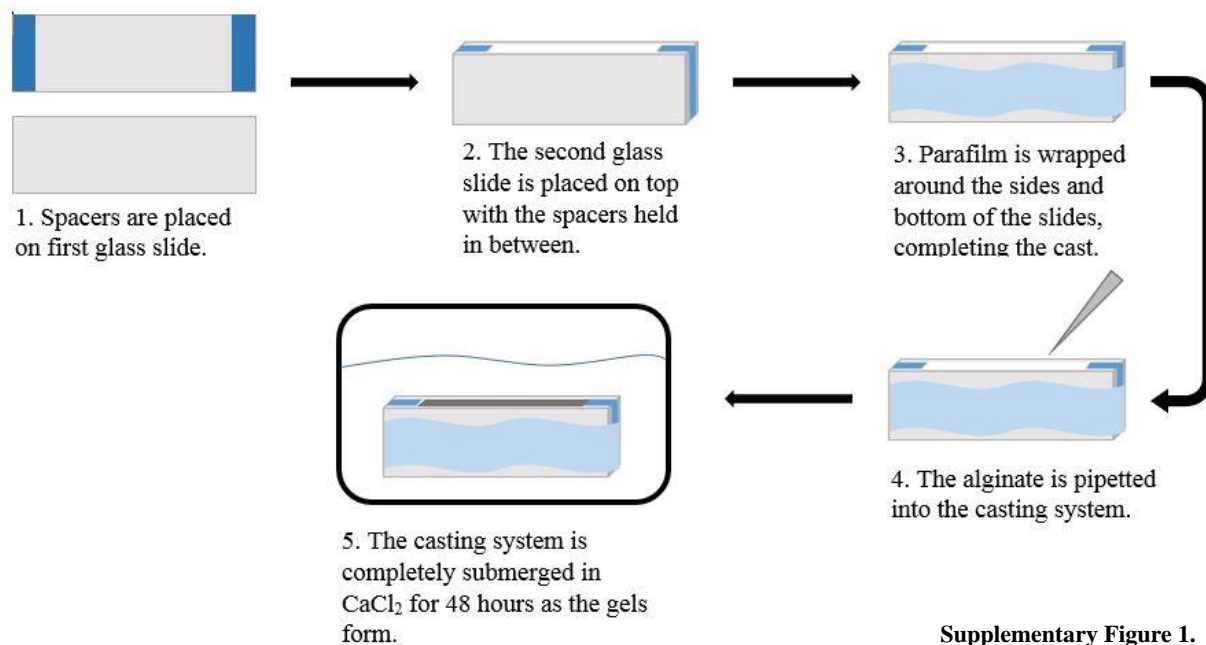

Supplementary Figure 1.

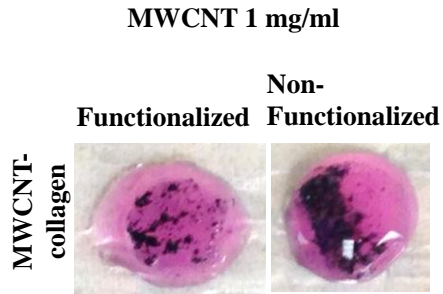

Representative *en-face* images of MWCNT-collagen (1 mg/ml) gels, functionalized (left) and non-functionalized (right) shown for comparison.

Supplementary Figure 2.

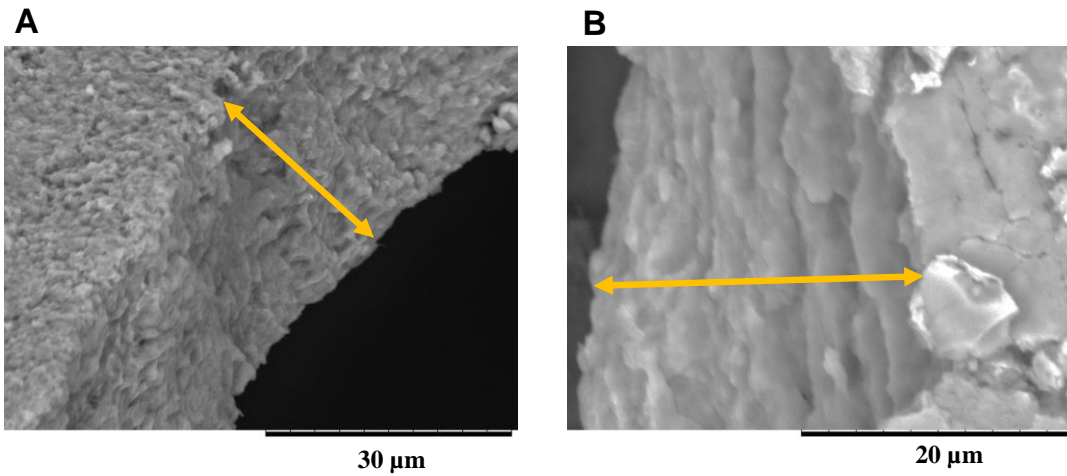

SEM image of the edge of MWCNT-alginate (1 mg/ml) showing laminated sheet-structure of the gels on their edge.

Supplementary Figure 3.

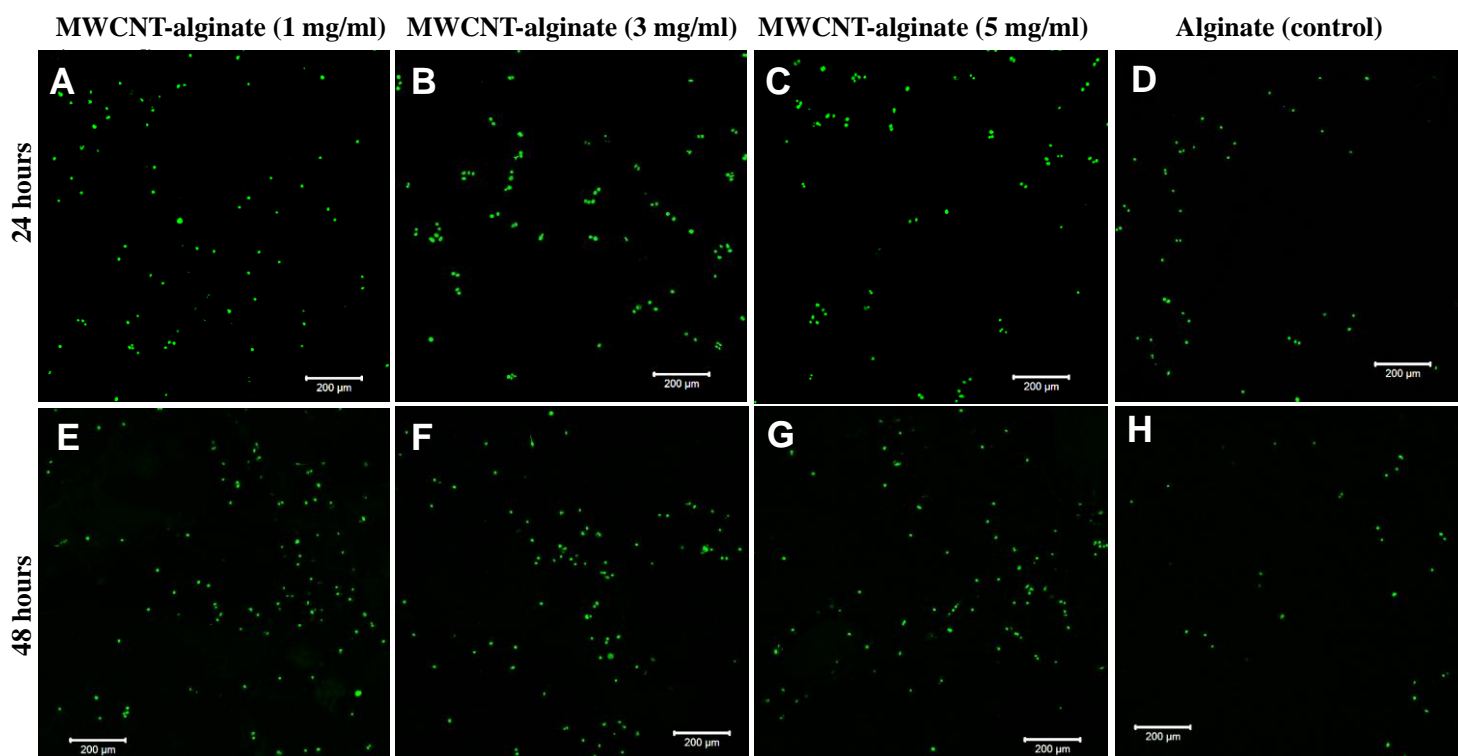

Low magnification images of HeLa-GFP cells cultured on MWCNT-alginate (1, 3, 5 mg/ml) showed agglomeration compared to cells on alginate; in addition, the cells continued to look healthy after 48h.

Supplementary Figure 4.

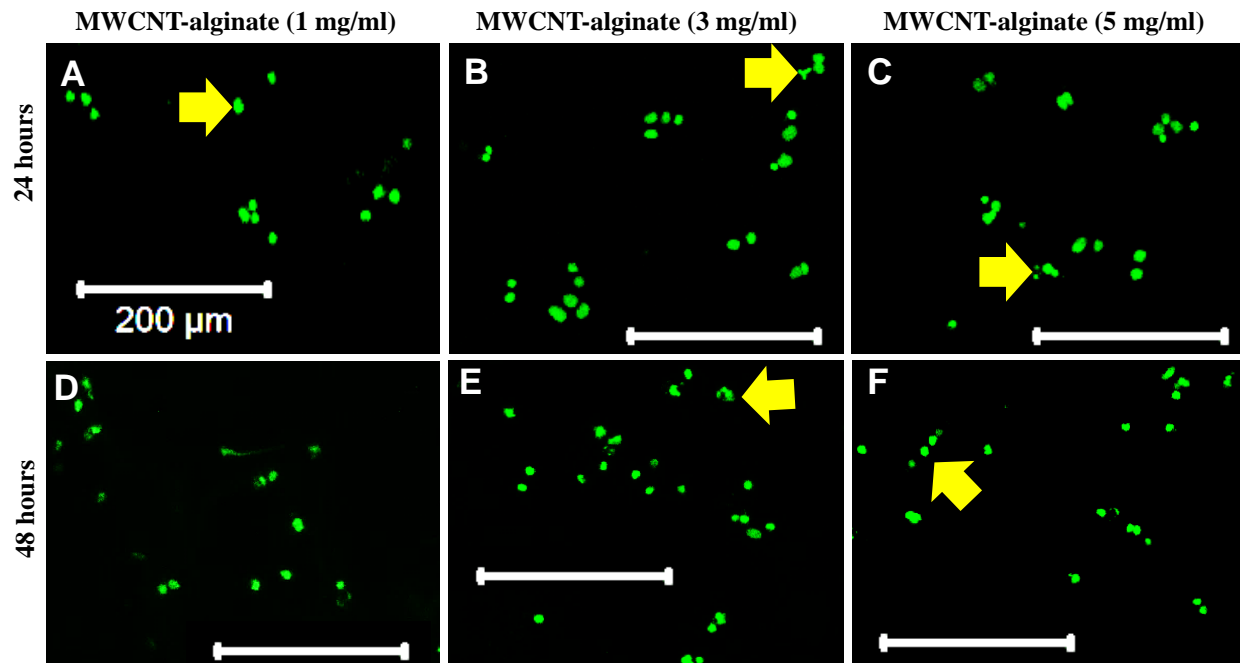

High magnification images of HeLa-GFP cells cultured on MWCNT-alginate (1, 3, 5 mg/ml). Arrows indicate cells actively dividing for proliferation.

Supplementary Figure 5.

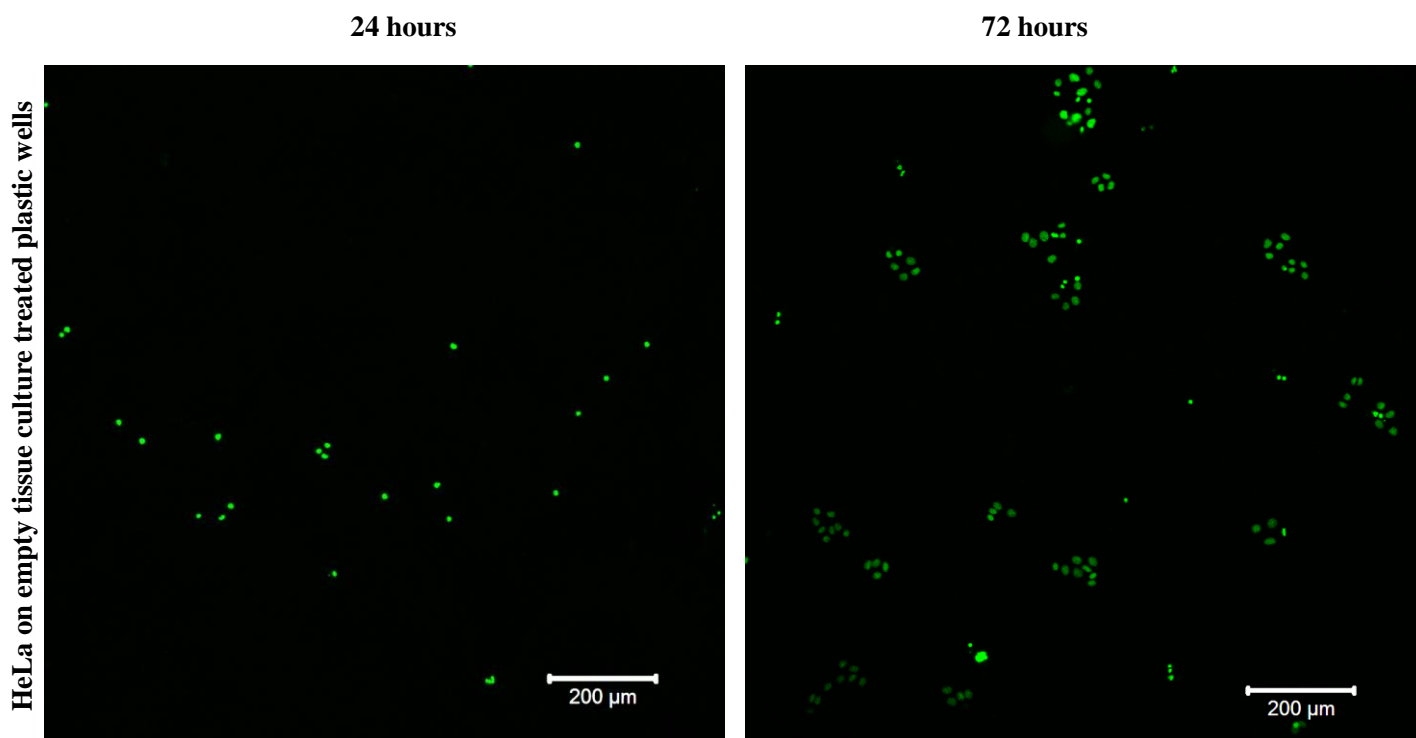

Supplementary Figure 6.
